# Supplementary material
Source: HighWire-hosted journal article supplement (https://bmjopen.bmj.com/content/15/4/e084696)
Supplement: inline-supplementary-material-2 [file inline-supplementary-material-2.pdf]

Table 1 Components of TOP intervention

| Brief name                                                                    | What?                                     | Why?                                                                                                                                                                         | How?                                                                                                                                                                                                                                                                                    | Who?                                                                                   | Where?                                                                                                                                                                                                                                                                     | When and how much?                         |
|-------------------------------------------------------------------------------|-------------------------------------------|------------------------------------------------------------------------------------------------------------------------------------------------------------------------------|-----------------------------------------------------------------------------------------------------------------------------------------------------------------------------------------------------------------------------------------------------------------------------------------|----------------------------------------------------------------------------------------|----------------------------------------------------------------------------------------------------------------------------------------------------------------------------------------------------------------------------------------------------------------------------|--------------------------------------------|
| Electronically available treatment-relevant information at hospital admission | Anamnesis support on admission            | Recognising inadequate outpatient pretherapy, avoiding errors in anamnesis                                                                                                   | Making treatment-relevant information electronically available from health insurance data                                                                                                                                                                                               | Pharmacist (ward pharmacist or hospital pharmacist)                                    | Access by computer using the TOP software in all parts of the participating hospital admitting patients (accident & emergency services, wards, pharmacy)                                                                                                                   | Once, when patient is admitted to hospital |
| MTM at hospital admission                                                     | Structured medication review on admission | Recognising prescription errors, correctly interpreting adverse drug reactions, reduction of prescription cascades, avoidance of treatment errors due to missing information | Electronically supported MTM review with subsequent recommendation for correcting inadequate medication therapy, medication reconciliation (between patient self-reports and health insurance data), documentation and communication of possible or necessary adjustments of medication | Pharmacist (ward pharmacist or hospital pharmacist), physician in patient`s department | Access by computer using the TOP software in all parts of the participating hospital admitting patients (accident & emergency services, wards, pharmacy)<br><br>Communication of adjustments to medication therapy through hospital information systems, by email or phone | Once, when patient is admitted to hospital |

|                                |                                                                           |                                                                                                                    |                                                                                                                                                                                                                                                                            |                                                                                        |                                                                                                                                                      |                                      |
|--------------------------------|---------------------------------------------------------------------------|--------------------------------------------------------------------------------------------------------------------|----------------------------------------------------------------------------------------------------------------------------------------------------------------------------------------------------------------------------------------------------------------------------|----------------------------------------------------------------------------------------|------------------------------------------------------------------------------------------------------------------------------------------------------|--------------------------------------|
| MTM during hospital stay       | Co-care of high-risk patients during their hospital stay                  | Improving MTM in the hospital, reducing mortality and complications in the hospital, avoidance of treatment errors | Electronically supported MTM review for inpatient medication therapy of high-risk patients                                                                                                                                                                                 | Pharmacist (ward pharmacist or hospital pharmacist)                                    | By computer using the TOP software                                                                                                                   | Daily during patient`s hospital stay |
| MTM at discharge from hospital | Medication checking and recommendation of medication therapy at discharge | Reducing medication errors                                                                                         | Electronically supported MTM review with subsequent recommendation for correcting inadequate medication therapy, documentation and communication of possible or necessary adjustments to medication, comparison of the final therapy recommendation to previous medication | Pharmacist (ward pharmacist or hospital pharmacist), physician in patient`s department | By computer using the TOP software<br><br>Communication of adjustments to medication therapy through hospital information systems, by email or phone | Once before patient is discharged    |

|                                                                      |                                          |                                                                                                                                                             |                                                                                                                                                                                                                 |                                                                           |                                                                                                   |                                                 |
|----------------------------------------------------------------------|------------------------------------------|-------------------------------------------------------------------------------------------------------------------------------------------------------------|-----------------------------------------------------------------------------------------------------------------------------------------------------------------------------------------------------------------|---------------------------------------------------------------------------|---------------------------------------------------------------------------------------------------|-------------------------------------------------|
| <b>Medication information of patients at discharge from hospital</b> | Patient empowerment at discharge         | Informing the patient about medication after discharge to improve health literacy, autonomy and adherence, reducing application errors                      | Pharmaceutical discharge interview (face-to-face) including information about BMP (printed handout of medication therapy), information regarding supplemental self-medication, therapy supporting notes via app | Pharmacist (ward pharmacist or hospital pharmacist)                       | The interview takes place in the patient's room or in a room of the department or pharmacy        | Once before patient is discharged               |
| <b>MTM-coordination at discharge from hospital</b>                   | Cross-sectoral coordination at discharge | Reducing medication errors and avoiding information breaches between sectors, avoidance of treatment errors due to insufficient cross-sectoral coordination | Coordination of changes to therapy with the general practitioner who continues treatment                                                                                                                        | Pharmacist (ward pharmacist or hospital pharmacist), general practitioner | Communication of adjustments to medication therapy through information systems, by email or phone | If necessary, once before patient is discharged |

MTM: medication therapy management
