# Supplementary material
Source: HighWire-hosted journal article supplement (https://bmjopen.bmj.com/content/15/4/e084696)
Supplement: inline-supplementary-material-3 [file inline-supplementary-material-3.pdf]

Table 2 Implementation strategies of TOP

| Name it:<br>ERIC<br>Implemen-<br>tation<br>strategy                           | Operationalise it                                                                                                                                                                                                                                                                                            |                                                                                                                                                                                                              |                                                                                                                                                               |                                                                                                                                                     |                 |                     |                                                                                                                                 |                                                                                    |                                                                                                                                                                                                                     |
|-------------------------------------------------------------------------------|--------------------------------------------------------------------------------------------------------------------------------------------------------------------------------------------------------------------------------------------------------------------------------------------------------------|--------------------------------------------------------------------------------------------------------------------------------------------------------------------------------------------------------------|---------------------------------------------------------------------------------------------------------------------------------------------------------------|-----------------------------------------------------------------------------------------------------------------------------------------------------|-----------------|---------------------|---------------------------------------------------------------------------------------------------------------------------------|------------------------------------------------------------------------------------|---------------------------------------------------------------------------------------------------------------------------------------------------------------------------------------------------------------------|
|                                                                               | Action                                                                                                                                                                                                                                                                                                       | Actor                                                                                                                                                                                                        | Context                                                                                                                                                       | Dose                                                                                                                                                | Action Target   |                     | Temporality                                                                                                                     | Implemen-<br>tation<br>Outcome                                                     | Justification                                                                                                                                                                                                       |
|                                                                               |                                                                                                                                                                                                                                                                                                              |                                                                                                                                                                                                              |                                                                                                                                                               |                                                                                                                                                     | Concep-<br>tual | Unit of<br>Analysis |                                                                                                                                 |                                                                                    |                                                                                                                                                                                                                     |
| Use evaluative and iterative strategies                                       |                                                                                                                                                                                                                                                                                                              |                                                                                                                                                                                                              |                                                                                                                                                               |                                                                                                                                                     |                 |                     |                                                                                                                                 |                                                                                    |                                                                                                                                                                                                                     |
| Assess for<br>readiness<br>and<br>identify<br>barriers<br>and<br>facilitators | Assessing<br>facilitators for and<br>barriers to<br>implementing the<br>TOP intervention<br>through collected<br>field notes and<br>assessment of<br>determinants of<br>implementation<br>(e.g. resources and<br>attitudes of<br>healthcare<br>professionals -<br>HCPs) through<br>written<br>questionnaires | HCPs (physicians<br>and<br>pharmacists) in<br>the hospitals for<br>data collection<br>through<br>questionnaires,<br>TOP study team<br>for collecting<br>field notes and<br>analysis of the<br>data collected | Assessment<br>and<br>analysis<br>electroni-<br>cally,<br>written<br>question-<br>naire is<br>sent to the<br>HCP to fill<br>in during<br>the hospital<br>shift | Field notes<br>are collected<br>continuously,<br>data<br>collection<br>with HCP<br>through<br>written<br>questionnaire<br>twice during<br>the study | Context         | Hospital<br>-based  | Field notes:<br>transition and<br>intervention<br>phases,<br>written<br>questionnaire:<br>control and<br>intervention<br>phases | Barrieres to<br>and<br>facilitators for<br>implementing<br>the TOP<br>intervention | To analyse<br>and control<br>the<br>organisation-<br>related<br>factors which<br>may have an<br>influence on<br>the degree of<br>TOP<br>implemen-<br>tation and<br>the<br>outcomes<br>measured in<br>study setting. |

|                                 |                                                                                                                                                                                                                |                                                                                                                                   |                                                                                                                    |                                                               |                                                 |                |                                                                      |                                                                                                                                              |                                                                                                                                                                                                               |
|---------------------------------|----------------------------------------------------------------------------------------------------------------------------------------------------------------------------------------------------------------|-----------------------------------------------------------------------------------------------------------------------------------|--------------------------------------------------------------------------------------------------------------------|---------------------------------------------------------------|-------------------------------------------------|----------------|----------------------------------------------------------------------|----------------------------------------------------------------------------------------------------------------------------------------------|---------------------------------------------------------------------------------------------------------------------------------------------------------------------------------------------------------------|
| Stage implementation scale-up   | For implementing the TOP intervention, there are two hospitals accompanying the study, which will implement the intervention before the C-RCT starts.                                                          | Two hospitals accompanying the C-RCT                                                                                              | Pharmacists (and physicians) at the accompanying hospitals implement and test the TOP intervention in routine care | Implementation takes place once in each accompanying hospital | Assistance to implementation                    | Hospital-based | In the preparation phase of the study (10 months before C-RCT start) | Barriers to and facilitators for implementing the TOP intervention, necessary adaptations of TOP intervention and its implementation process | TOP is a complex intervention that is to be introduced into routine care for the first time in 12 hospitals. To optimise the implementation process and intervention itself before it is tested in the study. |
| Provide interactive assistance  |                                                                                                                                                                                                                |                                                                                                                                   |                                                                                                                    |                                                               |                                                 |                |                                                                      |                                                                                                                                              |                                                                                                                                                                                                               |
| Centralise technical assistance | The two accompanying hospitals provide technical assistance on all issues of implementing the TOP intervention into routine care for hospitals included in the study if questions arise and support is needed. | Pharmacists at the accompanying hospitals in cooperation with the software developer/support team, pharmacists of study hospitals | Support is offered by phone, email and through online meetings                                                     | Support is offered as needed, online meetings once a week     | Context, implementation and mechanism of impact | Hospital-based | Transition and intervention phases                                   | Barriers and facilitators, adaptations, fidelity, feasibility, response                                                                      | To support the study hospitals in the best possible implementation of the TOP intervention.                                                                                                                   |

| Adapt and tailor to context |                                                                                                                                        |                                                                                      |                                                |                                |                                  |                |                                    |                                                      |                                                                                                                                                                                                                                                                |
|-----------------------------|----------------------------------------------------------------------------------------------------------------------------------------|--------------------------------------------------------------------------------------|------------------------------------------------|--------------------------------|----------------------------------|----------------|------------------------------------|------------------------------------------------------|----------------------------------------------------------------------------------------------------------------------------------------------------------------------------------------------------------------------------------------------------------------|
| Promote adaptability        | Tailoring the intervention to the given structures and processes of every study hospital (organisation-specific implementation-plans). | Pharmacists (and physicians) of the accompanying and study hospitals, TOP study team | Remotely by email, phone or in online meetings | Tailoring is offered as needed | Implementation and effectiveness | Hospital-based | Transition and intervention phases | Adaptations to intervention, fidelity, acceptability | To implement the TOP intervention into routine care, it is necessary to observe and take into account the given structures and processes of every health facility because they may differ as a function of the size of the hospital, patients, processes etc.. |

| Develop stakeholder interrelationships          |                                                                                                                                                                                                                                             |                                                                                                           |                               |                                                                                                                                                     |                                        |                |                                                                                  |                                             |                                                                                                                                                                                                            |
|-------------------------------------------------|---------------------------------------------------------------------------------------------------------------------------------------------------------------------------------------------------------------------------------------------|-----------------------------------------------------------------------------------------------------------|-------------------------------|-----------------------------------------------------------------------------------------------------------------------------------------------------|----------------------------------------|----------------|----------------------------------------------------------------------------------|---------------------------------------------|------------------------------------------------------------------------------------------------------------------------------------------------------------------------------------------------------------|
| Organise clinician implementation team meetings | Build structures for an information exchange between the pharmacists (and physicians) at the study hospitals                                                                                                                                | Pharmacists (and physicians) and key persons at the accompanying and study hospitals, TOP study team      | In online meetings, in person | Online meetings with pharmacists once a week, online meetings with study hospitals once a month, and if necessary, in-person meetings (once a year) | Implementation and mechanism of impact | Hospital-based | Transition and intervention phases                                               | Acceptability, appropriateness, feasibility | Use of lessons learned can improve the implementation process and acceptability, appropriateness and feasibility of the intervention.                                                                      |
| Train and educate stakeholders                  |                                                                                                                                                                                                                                             |                                                                                                           |                               |                                                                                                                                                     |                                        |                |                                                                                  |                                             |                                                                                                                                                                                                            |
| Conduct educational meetings                    | Educational meetings are held for key persons and HCPs on different topics (e.g. intervention details like process training, rules for reviewing indications for medication therapy, study details like evaluation of the TOP intervention) | TOP study team, key persons and HCPs at the two accompanying and study hospitals, software developer team | In online meetings, in person | Online meetings with pharmacists once a week, online meetings with study hospitals once a month and as necessary                                    | Implementation                         | Hospital-based | Established early in control phase of the C-RCT, maintained throughout the C-RCT | Fidelity, acceptability                     | Educational training is a necessary but insufficient strategy for behavioural change. Building knowledge is important for laying the foundation for the actual application of the intervention components. |

| Engage consumers |                                                                                                                                                                        |                       |                     |                                                                           |                                |                                  |                              |                                                       |                                                                                                                                                                                    |
|------------------|------------------------------------------------------------------------------------------------------------------------------------------------------------------------|-----------------------|---------------------|---------------------------------------------------------------------------|--------------------------------|----------------------------------|------------------------------|-------------------------------------------------------|------------------------------------------------------------------------------------------------------------------------------------------------------------------------------------|
| Use mass media   | Information on the TOP intervention is placed in newspapers, information materials (in print and online) by participating statutory health insurance providers (SHIPs) | SHIPs, TOP study team | In print and online | Established early in preparation phase of the C-RCT, maintained over time | Recruitment and implementation | Patient-based and hospital-based | Preparation and C-RCT phases | Recruitment and reach of intervention (patient-level) | Receiving information about the TOP intervention could improve patients` commitment to being involved in the study and thus improve the patient-related reach of the intervention. |

| Utilise financial strategies |                                                                                                                                                                                                                                                      |                        |                                      |                                                                                                                                                                    |                                                             |                                                |                                                                                                    |                                                                 |                                                                                                                                                                                                                                                                            |
|------------------------------|------------------------------------------------------------------------------------------------------------------------------------------------------------------------------------------------------------------------------------------------------|------------------------|--------------------------------------|--------------------------------------------------------------------------------------------------------------------------------------------------------------------|-------------------------------------------------------------|------------------------------------------------|----------------------------------------------------------------------------------------------------|-----------------------------------------------------------------|----------------------------------------------------------------------------------------------------------------------------------------------------------------------------------------------------------------------------------------------------------------------------|
| Use<br>capitated<br>payments | TOP intervention is part of a funded project of the G-BA, the hospitals receive financial support (e.g. amount per patient for an intervention delivered to the patient, hospitals receive funds for implementing the TOP software and hiring staff) | SHIPs,<br>Funder: G-BA | Funds are transferred electronically | Payments for financial support per patient are delivered depending on the number of patients recruited for the study, one-off payments for infrastructural support | Imple-<br>menta-<br>tion and<br>mecha-<br>nism of<br>impact | Patient-<br>based<br>and<br>hospital<br>-based | Amount per patient: transition and intervention phases, infrastructural payments: transition phase | Reach of intervention (patient and hospital level), feasibility | Implemen-<br>ting a new form of care is a highly complex process of change in the routine care of the hospitals, which are subject to financial pressure anyway. Financial support is necessary to optimise the implementa-<br>tion and use of new interventions like TOP. |
