# Supplementary material
Source: HighWire-hosted journal article supplement (https://bmjopen.bmj.com/content/15/4/e084696)
Supplement: inline-supplementary-material-4 [file inline-supplementary-material-4.pdf]

Table 3 Data collection of process evaluation

| Focus                                                                                                                                                                                                                                                                                             | Assessment                                                                    | Measurement point                          |
|---------------------------------------------------------------------------------------------------------------------------------------------------------------------------------------------------------------------------------------------------------------------------------------------------|-------------------------------------------------------------------------------|--------------------------------------------|
| <b>Domain – Context: In which context and setting does the intervention take place? What are the determinants of implementation?</b>                                                                                                                                                              |                                                                               |                                            |
| <i>Hospital level</i>                                                                                                                                                                                                                                                                             |                                                                               |                                            |
| <b>Hospital baseline data on organisational-structural conditions, e.g.:</b> <ul style="list-style-type: none"><li>- Organisational structures and processes</li><li>- Organisational culture</li><li>- Organisational Readiness for Implementing Change</li></ul>                                | Written survey: key person at the hospital (e.g. management, project manager) | Control phase                              |
| <b>Staff baseline data on organisational-personnel readiness, e.g.:</b> <ul style="list-style-type: none"><li>- Professional background</li><li>- Interprofessional collaboration</li><li>- Organisational Readiness for Implementing Change</li><li>- Acceptance and Use of Technology</li></ul> | Written survey: pharmaceutical and medical staff                              | Control phase                              |
| <i>Patient level</i>                                                                                                                                                                                                                                                                              |                                                                               |                                            |
| <b>Patient baseline data, e.g.:</b> <ul style="list-style-type: none"><li>- Socio-demographic data</li><li>- Previous experience with MTM and components of the TOP intervention</li></ul>                                                                                                        | Written survey: enrolled patients                                             | Shortly after discharge from hospital (t0) |
| <b>Domain – Context: What factors inhibit or promote implementation of the intervention? How is the intervention implemented in health care practice?</b>                                                                                                                                         |                                                                               |                                            |
| <i>Hospital level &amp; Patient level</i>                                                                                                                                                                                                                                                         |                                                                               |                                            |
| <b>Inhibiting and promoting factors</b>                                                                                                                                                                                                                                                           | Document analysis                                                             | Transition and intervention phases         |
| <i>Hospital level</i>                                                                                                                                                                                                                                                                             |                                                                               |                                            |
| <b>Implementation status, e.g.:</b> <ul style="list-style-type: none"><li>- Status of technical implementation</li><li>- Status of implementation of TOP processes</li></ul>                                                                                                                      | Document analysis                                                             | Transition and intervention phases         |

|                                                                                                                                                                                                                                                                                                 |                                                                          |                                                                             |
|-------------------------------------------------------------------------------------------------------------------------------------------------------------------------------------------------------------------------------------------------------------------------------------------------|--------------------------------------------------------------------------|-----------------------------------------------------------------------------|
| Domain – Recruitment: Who receives the intervention?                                                                                                                                                                                                                                            |                                                                          |                                                                             |
| Hospital level                                                                                                                                                                                                                                                                                  |                                                                          |                                                                             |
| <b>Data on representativeness, e.g.:</b> <ul style="list-style-type: none"><li>- Structural variables of alternative hospitals</li></ul>                                                                                                                                                        | Data extraction with survey form                                         | Control phase                                                               |
| <b>Participation information, e.g.:</b> <ul style="list-style-type: none"><li>- Reason for participation</li><li>- Implementation policy and practices, resources</li><li>- Tension for change, public needs (CFIR)</li></ul>                                                                   | Interview: key person at the hospital (e.g. management, project manager) | Transition phase                                                            |
| Patient level                                                                                                                                                                                                                                                                                   |                                                                          |                                                                             |
| <b>Data on the recruitment process, e.g.:</b> <ul style="list-style-type: none"><li>- Number of consents</li></ul>                                                                                                                                                                              | Document analysis                                                        | Control, transition and intervention phases                                 |
| Domain – Implementation: Is the intervention implemented and applied in principle, as planned? To what extent is the intervention implemented and applied?                                                                                                                                      |                                                                          |                                                                             |
| Hospital level                                                                                                                                                                                                                                                                                  |                                                                          |                                                                             |
| <b>Implementation process and implementation outcomes, e.g.:</b> <ul style="list-style-type: none"><li>- Appropriateness, feasibility, acceptability</li><li>- Implementation of intervention according to standard, adaptations to the interventions</li><li>- Fidelity, dose, reach</li></ul> | Written survey: pharmaceutical and medical staff                         | Intervention phase                                                          |
|                                                                                                                                                                                                                                                                                                 | Document analysis                                                        | Transition and intervention phases                                          |
| Patient level                                                                                                                                                                                                                                                                                   |                                                                          |                                                                             |
| <b>Implementation process and implementation outcomes, e.g.:</b> <ul style="list-style-type: none"><li>- Perception and evaluation of intervention components such as contact with pharmacist</li><li>- Reach, dose</li></ul>                                                                   | Written survey: enrolled patients                                        | Shortly after discharge (t0) and approximately 90 days after discharge (t1) |
|                                                                                                                                                                                                                                                                                                 | Document analysis (software data)                                        | Intervention phase                                                          |

|                                                                                                                                                                                                                                                         |                                                                          |                                                   |
|---------------------------------------------------------------------------------------------------------------------------------------------------------------------------------------------------------------------------------------------------------|--------------------------------------------------------------------------|---------------------------------------------------|
| <b>Domain – Mechanisms of impact: How is the intervention accepted by those involved? What are the unintended consequences and how are they to be evaluated?</b>                                                                                        |                                                                          |                                                   |
| <i>Hospital level</i>                                                                                                                                                                                                                                   |                                                                          |                                                   |
| <b>Response, e.g.:</b> <ul style="list-style-type: none"><li>- Intervention evaluation and attitudes towards TOP intervention</li><li>- Interprofessional collaboration</li><li>- Use of intervention in work routine (normalisation process)</li></ul> | Interview and written survey: pharmaceutical and medical staff           | Intervention phase                                |
|                                                                                                                                                                                                                                                         | Document analysis (software data)                                        | Intervention phase                                |
| <i>Patient level</i>                                                                                                                                                                                                                                    |                                                                          |                                                   |
| <b>Response, e.g.:</b> <ul style="list-style-type: none"><li>- Attitudes to and experiences of TOP intervention</li></ul>                                                                                                                               | Interview: subsample of enrolled patients                                | After discharge from hospital, Intervention phase |
| <b>Domain – Effectiveness: How effective is the intervention, as perceived by the participants? How are the results to be interpreted in relation to the targeted outcome parameters (primary and secondary outcomes)?</b>                              |                                                                          |                                                   |
| <i>Hospital level</i>                                                                                                                                                                                                                                   |                                                                          |                                                   |
| <b>Sustainability, e.g.:</b> <ul style="list-style-type: none"><li>- Organisation-related expectations of the intervention met</li><li>- Intentions for continuation</li></ul>                                                                          | Interview: key person at the hospital (e.g. management, project manager) | Intervention phase/follow-up phase                |
| <b>Reflection of the implementation process</b>                                                                                                                                                                                                         | Interview: inter-hospital group of experts                               | Intervention phase/follow-up phase                |
